# Supplementary material for: Genetic Analysis of QTL for Resistance to Maize Lethal Necrosis in Multiple Mapping Populations
Source: PubMed Central journal article supplement (PMC7017159; doi:10.3390/genes11010032), 2019-12-26
Supplement: genes-11-00032-s001.pdf [file genes-11-00032-s001.pdf]

**Table S1.** Genetic linkage groups constructed for resistance to MLN using 500 SNPs in seven F<sub>3</sub> populations.

|                                | LG1    | LG2    | LG3    | LG4    | LG5    | LG6    | LG7   | LG8    | LG9   | LG10   | Total   |
|--------------------------------|--------|--------|--------|--------|--------|--------|-------|--------|-------|--------|---------|
| <b>CKDHL120918 × CML494</b>    |        |        |        |        |        |        |       |        |       |        |         |
| No. markers                    | 13     | 15     | 13     | 14     | 11     | 12     | 5     | 15     | 5     | 9      | 112     |
| Map length (cM)                | 190    | 146.28 | 64.08  | 174.75 | 109.04 | 141.43 | 90.19 | 93.8   | 86.62 | 127.79 | 1223.97 |
| Ave. distance (cM)             | 14.61  | 9.75   | 4.93   | 12.48  | 9.91   | 11.79  | 18.04 | 6.25   | 17.32 | 14.2   | 10.93   |
| <b>CML543 × CML494</b>         |        |        |        |        |        |        |       |        |       |        |         |
| No. markers                    | 17     | 14     | 14     | 10     | 13     | 15     | 5     | 9      | 8     | 11     | 116     |
| Map length (cM)                | 175.7  | 129.54 | 121.98 | 122.74 | 119.72 | 110.72 | 127.8 | 97.64  | 118.9 | 109.35 | 1234.11 |
| Ave. distance (cM)             | 10.33  | 9.25   | 8.71   | 12.27  | 9.21   | 7.38   | 25.56 | 10.85  | 14.87 | 9.94   | 10.64   |
| <b>CKDHL120918 × CML543</b>    |        |        |        |        |        |        |       |        |       |        |         |
| No. markers                    | 19     | 9      | 9      | 9      | 16     | 17     | 4     | 16     | 7     | 12     | 118     |
| Map length (cM)                | 78.13  | 137.03 | 131.69 | 121.61 | 120.5  | 121.72 | 55.42 | 139.13 | 53.8  | 140.24 | 1099.27 |
| Ave. distance (cM)             | 4.11   | 15.23  | 14.63  | 13.51  | 7.53   | 7.16   | 13.86 | 8.7    | 7.69  | 11.69  | 9.32    |
| <b>CKLTI0227 × CKDHL120918</b> |        |        |        |        |        |        |       |        |       |        |         |
| No. markers                    | 48     | 22     | 39     | 38     | 39     | 26     | 15    | 23     | 23    | 25     | 298     |
| Map length (cM)                | 209.5  | 163.97 | 172.15 | 175.1  | 191    | 118.77 | 164.1 | 113.22 | 136.9 | 105.45 | 1550.07 |
| Ave. distance (cM)             | 4.36   | 7.45   | 4.41   | 4.61   | 4.9    | 4.57   | 10.94 | 4.92   | 5.95  | 4.22   | 5.2     |
| <b>CKDHL0089 × CKDHL120918</b> |        |        |        |        |        |        |       |        |       |        |         |
| No. markers                    | 17     | 15     | 17     | 12     | 21     | 14     | 4     | 13     | 10    | 5      | 128     |
| Map length (cM)                | 179.3  | 171.83 | 124.36 | 78.7   | 147.42 | 133.94 | 42.92 | 135.64 | 102.1 | 65.6   | 1181.87 |
| Ave. distance (cM)             | 10.55  | 11.46  | 7.32   | 6.56   | 7.02   | 9.57   | 10.73 | 10.43  | 10.21 | 13.12  | 9.23    |
| <b>CKDHL221 × CKDHL120312</b>  |        |        |        |        |        |        |       |        |       |        |         |
| No. markers                    | 19     | 15     | 16     | 12     | 14     | 10     | 3     | 13     | 5     | 11     | 118     |
| Map length (cM)                | 196.9  | 119.97 | 128.13 | 128.15 | 114.04 | 65.79  | 4.56  | 126.19 | 40.18 | 146.01 | 1069.92 |
| Ave. distance (cM)             | 10.36  | 8      | 8.01   | 10.68  | 8.15   | 6.58   | 1.52  | 9.71   | 8.04  | 13.27  | 9.07    |
| <b>CKDHL0089 × CML494</b>      |        |        |        |        |        |        |       |        |       |        |         |
| No. markers                    | 20     | 13     | 10     | 8      | 16     | 19     | 4     | 8      | 10    | 8      | 116     |
| Map length (cM)                | 183.4  | 52.44  | 87.67  | 104.71 | 115.4  | 110.85 | 68.55 | 236.97 | 129.8 | 113.7  | 1203.51 |
| Ave. distance (cM)             | 9.17   | 4.03   | 8.77   | 13.09  | 7.21   | 5.83   | 17.14 | 29.62  | 12.98 | 14.21  | 10.38   |
| Total No. markers              | 153.00 | 103.00 | 118.00 | 103.00 | 130.00 | 113.00 | 40.00 | 97.00  | 68.00 | 81.00  | 1006.00 |

|                       |         |        |        |        |        |        |        |        |        |        |         |
|-----------------------|---------|--------|--------|--------|--------|--------|--------|--------|--------|--------|---------|
| Overall mean          | 21.86   | 14.71  | 16.86  | 14.71  | 18.57  | 16.14  | 5.71   | 13.86  | 9.71   | 11.57  | 143.71  |
| Total map length (cM) | 1212.93 | 921.06 | 830.06 | 905.76 | 917.12 | 803.22 | 553.54 | 942.59 | 668.30 | 808.14 | 8562.72 |
| Overall mean          | 173.28  | 131.58 | 118.58 | 129.39 | 131.02 | 114.75 | 79.08  | 134.66 | 95.47  | 115.45 | 1223.25 |
| Total distance (cM)   | 63.49   | 65.17  | 56.78  | 73.20  | 53.93  | 52.88  | 97.79  | 80.48  | 77.06  | 80.65  | 64.77   |
| Overall mean          | 9.07    | 9.31   | 8.11   | 10.46  | 7.70   | 7.55   | 13.97  | 11.50  | 11.01  | 11.52  | 9.25    |

Ch1–Chr10 = number of chromosomes.

**Table S2.** Twenty-three common QTLs and specific SNP detected in both linkage mapping and joint linkage association mapping across seven F<sub>3</sub> populations and their associated candidate genes.

| SNP_Name     | Chr | Position  | QTL_Name          | Fav Parent  | Putative Candidate Gene | Predicted Function of Candidate Gene                         |
|--------------|-----|-----------|-------------------|-------------|-------------------------|--------------------------------------------------------------|
| PZA00447_8   | 1   | 9024005   | <i>qMLN1_9</i>    | CKDHL120312 | GRMZM2G000039           | Serine/threonine-protein phosphatase                         |
| PHM5622_21   | 1   | 183831657 | <i>qMLN1_184</i>  | CKDHL120918 | GRMZM2G113726           | Protein binding                                              |
| S3_48493677  | 3   | 48493677  | <i>qMLN3_48</i>   | -           | GRMZM2G017520           | Transcription factor, Myb superfamily                        |
| S3_55444954  | 3   | 55444954  | <i>qMLN3_55</i>   | CKDHL120918 | AC200298.4_FG001        | Metal ion binding                                            |
| S3_68596995  | 3   | 68596995  | <i>qMLN3_68</i>   | CKDHL120918 | GRMZM2G132222           | Ubiquitin-dependent protein catabolic process                |
| PHM15449_10  | 3   | 125077922 | <i>qMLN3_125</i>  | CKDHL0089   | GRMZM2G085433           | Nucleic acid binding                                         |
| S3_148291047 | 3   | 148291047 | <i>qMLN3_148</i>  | CKDHL120918 | GRMZM2G156019           | Phosphor lay signal transduction system                      |
| S3_151342843 | 3   | 151342843 | <i>qMLN3_151</i>  | CKDHL120918 | GRMZM2G030902           | Nucleic acid binding                                         |
| PZA00920_1   | 3   | 142821031 | <i>qMLN3_142</i>  | CKDHL0221   | GRMZM2G445999           | Calcium ion binding                                          |
| PZA00726_8   | 4   | 60767943  | <i>qMLN4_60</i>   | CKDHL120918 | GRMZM2G030768           | Zinc ion binding, hydrolase activity                         |
| S4_155378923 | 4   | 155378923 | <i>qMLN4_155</i>  | CKDHL120918 | GRMZM2G137029           | Protein binding                                              |
| S5_170164477 | 5   | 170164477 | <i>qMLN5_170</i>  | CKDHL120918 | GRMZM2G092588           | Glycosyl transferases group                                  |
| PHM7908_25   | 5   | 191075472 | <i>qMLN5_191</i>  | CML494      | GRMZM2G097846           | P-loop containing nucleoside triphosphate hydrolases         |
| S5_196017729 | 5   | 196017729 | <i>qMLN5_196</i>  | -           | GRMZM2G037200           | Protein binding                                              |
| S5_202816906 | 5   | 202816906 | <i>qMLN5_202</i>  | CKDHL120918 | GRMZM2G480620           | Uncharacterized protein                                      |
| PHM563_9     | 5   | 204993639 | <i>qMLN5_204</i>  | CML494      | GRMZM5G824439           | Uncharacterized protein                                      |
| S6_86475982  | 6   | 86475982  | <i>qMLN6_86</i>   | CKDHL120918 | GRMZM2G083022           | Protein binding; PPR: pentatricopeptide repeat domain        |
| S6_89823772  | 6   | 89823772  | <i>qMLN6_90</i>   | CKDHL120918 | GRMZM2G045414           | -                                                            |
| PHM5235_8    | 8   | 94414978  | <i>qMLN8_94</i>   | CKDHL0221   | GRMZM2G142427           | -                                                            |
| S8_102533570 | 8   | 102533570 | <i>qMLN8_102</i>  | CKDHL0221   | GRMZM5G805387           | Transcription factor activity, sequence-specific DNA binding |
| PZA01313_2   | 10  | 3598262   | <i>qMLN10_4</i>   | CKDHL120918 | GRMZM2G069382           | LRR containing protein                                       |
| PHM5740_9    | 10  | 8773358   | <i>qMLN10_9</i>   | CKDHL120918 | GRMZM2G001272           | Tub family proteins; protein binding                         |
| PZA00866_2   | 10  | 124203565 | <i>qMLN10_124</i> | CML494      | AC203841.3_FG002        | DYW family of nucleic acid deaminases                        |
